# Supplementary material for: The longitudinal association between onion consumption and risk of depressive symptoms: results from the TCLSIH Cohort study and the UK Biobank
Source: Royal Society of Chemistry journal article supplement (doi:10.1039/d2fo01640k), 2022-10-28
Supplement: d2fo01640k1.pdf [file d2fo01640k1.pdf]

**Supplemental Table 1.** Baseline characteristics of participants according to the categories of onion consumption in the TCLSIH Cohort Study (n=7,739) and UK Biobank (n=169,806) <sup>a</sup>.

| Characteristics                        | Category of onion consumption (g/(1000 kcal · d)) |                      |                      |                      | <i>P</i> values <sup>b</sup> |
|----------------------------------------|---------------------------------------------------|----------------------|----------------------|----------------------|------------------------------|
|                                        | Level 1                                           | Level 2              | Level 3              | Level 4              |                              |
| <b>The TCLSIH</b>                      | □                                                 | □                    | □                    | □                    | □                            |
| Medians                                | 0.00                                              | 1.19                 | 2.16                 | 4.91                 | -                            |
| No. of subjects                        | 1,143                                             | 2,194                | 2,201                | 2,201                | -                            |
| Men (%)                                | 50.7                                              | 56.2                 | 60.8                 | 59.4                 | -                            |
| Age (years)                            | 38.3 (38.1, 38.5) <sup>c</sup>                    | 38.1 (38.0, 38.3)    | 38.3 (38.2, 38.5)    | 38.3 (38.2, 38.5)    | 0.47                         |
| Married (%)                            | 80.5                                              | 85.8                 | 84.5                 | 84.4                 | 0.12                         |
| Education level (college or higher, %) | 75.7                                              | 82.5                 | 82.4                 | 80.2                 | 0.13                         |
| Occupation (%)                         |                                                   |                      |                      |                      |                              |
| Managers                               | 47.6                                              | 53.2                 | 52.2                 | 52.0                 | 0.13                         |
| Professionals                          | 17.7                                              | 17.0                 | 20.6                 | 18.9                 | 0.25                         |
| Other                                  | 34.7                                              | 29.8                 | 27.2                 | 29.1                 | 0.01                         |
| Household income (≥10,000 Yuan, %)     | 41.7                                              | 47.7                 | 47.6                 | 46.4                 | 0.08                         |
| BMI (kg/m <sup>2</sup> )               | 23.8 (23.6, 24.0)                                 | 23.9 (23.7, 24.0)    | 24.0 (23.8, 24.1)    | 24.1 (24.0, 24.2)    | 0.04                         |
| WC (cm)                                | 80.2 (79.7, 80.7)                                 | 80.7 (79.9, 80.6)    | 80.4 (80.0, 80.7)    | 80.6 (80.2, 80.9)    | 0.56                         |
| TC (mmol/L)                            | 4.64 (4.59, 4.69)                                 | 4.61 (4.61, 4.61)    | 4.61 (4.57, 4.64)    | 4.64 (4.60, 4.67)    | 0.49                         |
| TG (mmol/L)                            | 1.11 (1.08, 1.15)                                 | 1.09 (1.07, 1.12)    | 1.08 (1.06, 1.11)    | 1.12 (1.09, 1.14)    | 0.18                         |
| LDL-C (mmol/L)                         | 2.64 (2.59, 2.59)                                 | 2.61 (2.58, 2.64)    | 2.63 (2.59, 2.66)    | 2.64 (2.6, 2.67)     | 0.62                         |
| HDL-C (mmol/L)                         | 1.35 (1.33, 1.37)                                 | 1.36 (1.35, 1.38)    | 1.35 (1.33, 1.36)    | 1.35 (1.35, 1.37)    | 0.44                         |
| FBG (mmol/L)                           | 5.02 (4.98, 5.05)                                 | 5.05 (5.01, 5.06)    | 5.03 (5.00, 5.06)    | 5.07 (5.04, 5.09)    | 0.11                         |
| SBP (mmHg)                             | 119.0 (118.2, 119.8)                              | 118.2 (117.6, 118.8) | 119.2 (118.6, 119.8) | 119.4 (118.9, 120.0) | 0.02                         |

|                                   |                         |                         |                         |                         |          |
|-----------------------------------|-------------------------|-------------------------|-------------------------|-------------------------|----------|
| DBP (mmHg)                        | 75.0 (74.5, 75.6)       | 74.7 (74.3, 75.1)       | 75.3 (74.9, 75.7)       | 75.5 (75.1, 75.9)       | 0.04     |
| Total energy intake (kcal/day)    | 2024.5 (1982.8, 2067.0) | 2572.9 (2534.4, 2611.9) | 2132.2 (2100.3, 2164.7) | 2252.0 (2218.3, 2286.2) | < 0.0001 |
| PA (MET × hour/week)              | 9.96 (9.27, 10.7)       | 10.7 (10.2, 11.3)       | 10.2 (9.65, 10.7)       | 11.4 (10.9, 12.1)       | 0.003    |
| Healthy diet scores               | 0.57 (0.41, 0.80)       | 0.57 (0.45, 0.73)       | 0.70 (0.55, 0.89)       | 1.36 (1.06, 1.73)       | < 0.0001 |
| Baseline SDS scores               | 33.8 (33.5, 34.2)       | 33.7 (33.4, 34.0)       | 33.7 (33.5, 34.0)       | 33.6 (33.3, 33.8)       | 0.52     |
| Smoking status (%)                |                         |                         |                         |                         |          |
| Current smoker                    | 17.4                    | 17.2                    | 18.7                    | 18.5                    | 0.68     |
| Ex-smoker                         | 4.73                    | 5.49                    | 5.74                    | 5.51                    | 0.65     |
| Non-smoker                        | 77.9                    | 77.3                    | 75.6                    | 76.0                    | 0.89     |
| Drinking status (%)               |                         |                         |                         |                         |          |
| Everyday                          | 2.70                    | 3.45                    | 2.94                    | 3.16                    | 0.98     |
| Sometime                          | 51.9                    | 61.4                    | 64.9                    | 62.8                    | < 0.0001 |
| Ex-drinker                        | 9.98                    | 9.38                    | 8.11                    | 8.78                    | 0.16     |
| Non-drinker                       | 35.3                    | 25.8                    | 24.0                    | 25.3                    | 0.001    |
| Living alone (%)                  | 9.45                    | 5.56                    | 7.00                    | 7.95                    | 0.75     |
| Visiting friends (%)              | 54.3                    | 54.7                    | 53.8                    | 57.6                    | 0.01     |
| Individual history of disease (%) |                         |                         |                         |                         |          |
| Hypertension                      | 20.7                    | 20.3                    | 21.4                    | 23.1                    | 0.07     |
| Hyperlipidemia                    | 45.2                    | 42.2                    | 45.0                    | 46.3                    | 0.28     |
| Diabetes                          | 4.29                    | 4.33                    | 4.27                    | 5.82                    | 0.02     |
| Family history of disease (%)     |                         |                         |                         |                         |          |
| CVD                               | 32.1                    | 32.7                    | 34.2                    | 33.8                    | 0.11     |
| Hypertension                      | 51.5                    | 55.7                    | 55.0                    | 54.4                    | 0.27     |
| Hyperlipidemia                    | 0.61                    | 0.41                    | 0.45                    | 0.41                    | 0.57     |

|                                        |                         |                         |                         |                         |             |
|----------------------------------------|-------------------------|-------------------------|-------------------------|-------------------------|-------------|
| Diabetes                               | 29.2                    | 27.6                    | 28.7                    | 29.9                    | 0.22        |
| <b>The UK Biobank</b>                  |                         |                         |                         |                         |             |
| Medians                                | 0.00                    | 3.66                    | 8.83                    | 21.4                    | -           |
| No. of subjects                        | 112,649                 | 19,036                  | 19,051                  | 19,070                  | -           |
| Men (%)                                | 47.8                    | 44.7                    | 39.9                    | 35.4                    | -           |
| Age (years)                            | 55.0 (55.0, 55.1)       | 55.1 (55.1, 55.2)       | 55.1 (55.1, 55.1)       | 55.2 (55.2, 55.2)       | <<br>0.0001 |
| Ethnic background (%)                  |                         |                         |                         |                         |             |
| White                                  | 91.4                    | 90.7                    | 90.6                    | 90.5                    | <<br>0.0001 |
| Mixed                                  | 3.16                    | 2.86                    | 3.03                    | 3.50                    | 0.07        |
| Asian                                  | 4.02                    | 4.82                    | 4.56                    | 4.27                    | 0.01        |
| Black                                  | 0.44                    | 0.56                    | 0.57                    | 0.62                    | 0.0001      |
| Chinese                                | 0.31                    | 0.34                    | 0.27                    | 0.28                    | 0.23        |
| Others                                 | 0.68                    | 0.76                    | 0.95                    | 0.83                    | 0.0003      |
| Townsend deprivation index             | -1.63 (-1.64, -1.61)    | -1.68 (-1.72, -1.64)    | -1.64 (-1.68, -1.60)    | -1.57 (-1.61, -1.53)    | 0.001       |
| Education level (college or higher, %) | 14.4                    | 16.8                    | 15.6                    | 14.1                    | 0.0007      |
| BMI (kg/m <sup>2</sup> )               | 26.5 (26.5, 26.5)       | 26.1 (26.0, 26.2)       | 26.4 (26.3, 26.4)       | 26.8 (26.7, 26.9)       | <<br>0.0001 |
| Total energy intake (kcal/day)         | 2014.9 (2012.1, 2017.7) | 2173.0 (2165.7, 2180.4) | 2086.1 (2079.1, 2093.2) | 1985.0 (1978.2, 1991.7) | <<br>0.0001 |
| PA (MET × hour/week)                   | 19.3 (19.0, 19.6)       | 21.0 (20.2, 21.8)       | 22.7 (21.8, 23.6)       | 22.7 (21.8, 23.6)       | <<br>0.0001 |
| Healthy diet scores                    | 3.10 (3.07, 3.14)       | 3.52 (3.44, 3.61)       | 3.54 (3.46, 3.63)       | 3.53 (3.45, 3.62)       | <<br>0.0001 |
| Smoking status (%)                     |                         |                         |                         |                         |             |

|                                   |      |      |      |      |             |
|-----------------------------------|------|------|------|------|-------------|
| Current smoker                    | 7.76 | 6.67 | 6.71 | 7.71 | 0.88        |
| Ex-smoker                         | 33.7 | 35   | 35.5 | 37.0 | <<br>0.0001 |
| Non-smoker                        | 58.5 | 58.3 | 57.8 | 55.3 | <<br>0.0001 |
| Drinking status (%)               |      |      |      |      |             |
| Current drinker                   | 94.0 | 95.5 | 94.7 | 94.1 | <<br>0.0001 |
| Ex-drinker                        | 2.76 | 2.14 | 2.42 | 2.83 | 0.06        |
| Non-drinker                       | 3.27 | 2.37 | 2.89 | 3.04 | <<br>0.0001 |
| Living alone                      | 17.1 | 15.4 | 15.2 | 16.5 | <<br>0.0001 |
| Visiting friends (%)              | 75.4 | 75.0 | 76.4 | 77.8 | 0.0003      |
| Individual history of disease (%) |      |      |      |      |             |
| Hypertension                      | 21.5 | 20.8 | 21.5 | 22.8 | <<br>0.0001 |
| Diabetes                          | 2.91 | 2.4  | 2.81 | 3.21 | 0.007       |
| Family history of disease (%)     |      |      |      |      |             |
| CVD                               | 54.8 | 56   | 56.6 | 56.5 | 0.0002      |
| Hypertension                      | 48.6 | 49.7 | 49.6 | 51.4 | <<br>0.0001 |
| Diabetes                          | 20.8 | 20.5 | 21.0 | 21.7 | 0.03        |

<sup>a</sup> Abbreviations: TCLSIH, Tianjin Chronic Low-grade Systemic Inflammation and Health; BMI, body mass index; WC, waist circumference; TC, total cholesterol; TG, triglycerides; LDL-C, low-density lipoprotein cholesterol; HDL-C, high-density lipoprotein cholesterol; FBG fasting blood glucose; SBP, systolic blood pressure; DBP, diastolic blood pressure; PA, physical activity; SDS, Self-Rating Depression Scale; MET, metabolic equivalent; CVD, cardiovascular disease.

<sup>b</sup> Continuous variables are expressed as geometric means (95% confidence intervals) and categorical variables are expressed as percentages.

<sup>c</sup> Analysis of covariance analysis or Chi-square tests adjusted for age and sex where appropriate.

**Supplemental Table 2.** The association between onion consumption and risk of depressive symptoms in the TCLSIH Cohort Study (n=8,073) and UK Biobank (n=193,516) when including participants with cancer and CVD <sup>a</sup>.

| □                     | Categories of onion consumption |                                |                   |                   | <i>P</i> for trend <sup>b</sup> |
|-----------------------|---------------------------------|--------------------------------|-------------------|-------------------|---------------------------------|
|                       | Level 1                         | Level 2                        | Level 3           | Level 4           |                                 |
| <b>The TCLSIH</b>     | □                               | □                              | □                 | □                 | □                               |
| Participants, n       | 1,208                           | 2,274                          | 2,295             | 2,296             | -                               |
| Cases, n              | 219                             | 329                            | 292               | 317               | -                               |
| Person-years          | 2,239                           | 4,466                          | 4,428             | 4,501             | -                               |
| Model 1 <sup>c</sup>  | 1.00 (reference)                | 0.75 (0.64, 0.90) <sup>f</sup> | 0.68 (0.57, 0.80) | 0.72 (0.61, 0.86) | 0.0006                          |
| Model 2 <sup>d</sup>  | 1.00 (reference)                | 0.76 (0.64, 0.90)              | 0.68 (0.57, 0.81) | 0.72 (0.61, 0.86) | 0.0006                          |
| Model 3 <sup>e</sup>  | 1.00 (reference)                | 0.77 (0.64, 0.91)              | 0.72 (0.60, 0.86) | 0.75 (0.63, 0.90) | 0.005                           |
| <b>The UK Biobank</b> |                                 |                                |                   |                   |                                 |
| Participants, n       | 128,425                         | 21,647                         | 21,712            | 21,732            | -                               |
| Cases, n              | 1,628                           | 212                            | 233               | 295               | -                               |
| Person-years          | 935,721                         | 160,463                        | 160,497           | 157,494           | -                               |
| Model 1 <sup>c</sup>  | 1.00 (reference)                | 0.77 (0.66, 0.88)              | 0.84 (0.73, 0.97) | 1.07 (0.95, 1.22) | 0.54                            |
| Model 2 <sup>d</sup>  | 1.00 (reference)                | 0.78 (0.68, 0.90)              | 0.82 (0.72, 0.94) | 1.00 (0.89, 1.14) | 0.12                            |
| Model 3 <sup>e</sup>  | 1.00 (reference)                | 0.80 (0.70, 0.93)              | 0.84 (0.73, 0.96) | 1.00 (0.88, 1.13) | 0.15                            |

<sup>a</sup> Abbreviations: TCLSIH, Tianjin Chronic Low-grade Systemic Inflammation and Health; BMI, body mass index; SDS, Self-Rating Depression Scale.

<sup>b</sup> Based on categories of onion consumption as a continuous variable.

<sup>c</sup> Model 1 was a crude model.

<sup>d</sup> Model 2 was further adjusted for age, sex, and BMI.

<sup>e</sup> Model 3 was further adjusted for smoking status, drinking status, education level, ethnic background (only in the UK Biobank), occupation (only in the TCLSIH cohort), household income (only in the TCLSIH cohort), Townsend deprivation index (only in the UK Biobank), total energy intake, physical activity, individual history of disease

(including hypertension, hyperlipidemia [only in the TCLSIH cohort], and diabetes), friends visiting, living alone, marital status (only in the TCLSIH cohort), family history of disease (including cardiovascular disease, hypertension, hyperlipidemia [only in the TCLSIH cohort], and diabetes), baseline SDS score (only in the TCLSIH cohort), and healthy diet scores.

<sup>f</sup>Hazard ratios (95% confidence intervals) (all such values).

**Supplemental Table 3.** The association between onion consumption and risk of depressive symptoms in the TCLSIH Cohort Study (n=6,842) and UK Biobank (n=163,803) when excluding participants who reported dietary changes during follow-up <sup>a</sup>.

| □                        | Categories of onion consumption |                                |                   |                   | <i>P</i> for trend <sup>b</sup> |
|--------------------------|---------------------------------|--------------------------------|-------------------|-------------------|---------------------------------|
|                          | Level 1                         | Level 2                        | Level 3           | Level 4           |                                 |
| <b>The TCLSIH cohort</b> | □                               | □                              | □                 | □                 | □                               |
| Participants, n          | 1,019                           | 1,963                          | 1,944             | 1,916             | -                               |
| Cases, n                 | 176                             | 265                            | 239               | 265               | -                               |
| Person-years             | 1,900                           | 3,844                          | 3,758             | 3,777             | -                               |
| Model 1 <sup>c</sup>     | 1.00 (reference)                | 0.74 (0.62, 0.90) <sup>f</sup> | 0.69 (0.57, 0.84) | 0.76 (0.63, 0.92) | 0.02                            |
| Model 2 <sup>d</sup>     | 1.00 (reference)                | 0.75 (0.62, 0.90)              | 0.69 (0.57, 0.84) | 0.76 (0.63, 0.92) | 0.02                            |
| Model 3 <sup>e</sup>     | 1.00 (reference)                | 0.76 (0.62, 0.92)              | 0.71 (0.58, 0.86) | 0.78 (0.63, 0.95) | 0.04                            |
| <b>The UK Biobank</b>    |                                 |                                |                   |                   |                                 |
| Participants, n          | 108,548                         | 18,416                         | 18,411            | 18,428            | -                               |
| Cases, n                 | 1,267                           | 164                            | 180               | 221               | -                               |
| Person-years             | 793,233                         | 136,506                        | 136,349           | 134,007           | -                               |
| Model 1 <sup>c</sup>     | 1.00 (reference)                | 0.76 (0.64, 0.89)              | 0.83 (0.71, 0.97) | 1.03 (0.89, 1.19) | 0.27                            |
| Model 2 <sup>d</sup>     | 1.00 (reference)                | 0.77 (0.65, 0.91)              | 0.81 (0.69, 0.95) | 0.96 (0.83, 1.10) | 0.04                            |
| Model 3 <sup>e</sup>     | 1.00 (reference)                | 0.79 (0.67, 0.93)              | 0.82 (0.70, 0.96) | 0.96 (0.83, 1.10) | 0.06                            |

<sup>a</sup> Abbreviations: TCLSIH, Tianjin Chronic Low-grade Systemic Inflammation and Health; BMI, body mass index; SDS, Self-Rating Depression Scale.

<sup>b</sup> Based on categories of onion consumption as a continuous variable.

<sup>c</sup> Model 1 was a crude model.

<sup>d</sup> Model 2 was further adjusted for age, sex, and BMI.

<sup>e</sup> Model 3 was further adjusted for smoking status, drinking status, education level, ethnic background (only in the UK Biobank), occupation (only in the TCLSIH cohort), household income (only in the TCLSIH cohort), Townsend deprivation index (only in the UK Biobank), total energy intake, physical activity, individual history of disease (including hypertension, hyperlipidemia



[only in the TCLSIH cohort], and diabetes), friends visiting, living alone, marital status (only in the TCLSIH cohort), family history of disease (including cardiovascular disease, hypertension, hyperlipidemia [only in the TCLSIH cohort], and diabetes), baseline SDS score (only in the TCLSIH cohort), and healthy diet scores.

<sup>f</sup>Hazard ratios (95% confidence intervals) (all such values).

**Supplemental Table 4.** The association between onion consumption and risk of depressive symptoms in the TCLSIH Cohort Study when excluding participants younger than 40 or older than 70 years (n=3,189) <sup>a</sup>.

| □                    | Categories of onion consumption |                                |                   |                   | <i>P</i> for trend <sup>b</sup> |
|----------------------|---------------------------------|--------------------------------|-------------------|-------------------|---------------------------------|
|                      | Level 1                         | Level 2                        | Level 3           | Level 4           |                                 |
| Participants, n      | 476                             | 927                            | 882               | 904               | -                               |
| Cases, n             | 92                              | 138                            | 108               | 129               | -                               |
| Person-years         | 850                             | 1,792                          | 1,653             | 1,729             | -                               |
| Model 1 <sup>c</sup> | 1.00 (reference)                | 0.71 (0.55, 0.93) <sup>f</sup> | 0.61 (0.46, 0.80) | 0.69 (0.53, 0.90) | 0.01                            |
| Model 2 <sup>d</sup> | 1.00 (reference)                | 0.73 (0.56, 0.95)              | 0.62 (0.47, 0.81) | 0.69 (0.53, 0.91) | 0.01                            |
| Model 3 <sup>e</sup> | 1.00 (reference)                | 0.75 (0.57, 0.99)              | 0.65 (0.49, 0.87) | 0.73 (0.55, 0.98) | 0.04                            |

<sup>a</sup> Abbreviations: TCLSIH, Tianjin Chronic Low-grade Systemic Inflammation and Health; BMI, body mass index; SDS, Self-Rating Depression Scale.

<sup>b</sup> Based on categories of onion consumption as a continuous variable.

<sup>c</sup> Model 1 was a crude model.

<sup>d</sup> Model 2 was further adjusted for age, sex, and BMI.

<sup>e</sup> Model 3 was further adjusted for smoking status, drinking status, education level, occupation, household income, total energy intake, physical activity, individual history of disease (including hypertension, hyperlipidemia, and diabetes), friends visiting, living alone, marital status, family history of disease (including cardiovascular disease, hypertension, hyperlipidemia, and diabetes), baseline SDS score, and healthy diet scores.

<sup>f</sup> Hazard ratios (95% confidence intervals) (all such values).
